# Supplementary material for: Regulation of branched versus linear Arp2/3‐generated actin filaments
Source: PubMed Central journal article supplement (PMC10152144; doi:10.15252/embj.2022113008), 2023-03-20
Supplement: EMBJ-42-e113008-s005.pdf [file EMBJ-42-e113008-s005.pdf]

## Expanded View Figures

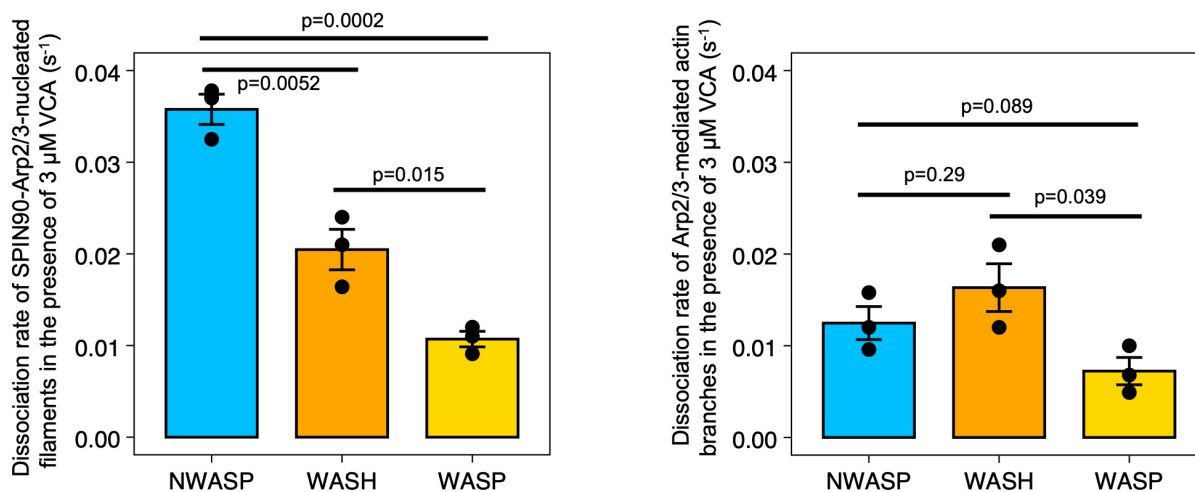

**Figure EV1.** Comparing the VCA motifs from different NPFs in their ability to destabilize linear filaments nucleated by SPIN90-Arp2/3 (left) or Arp2/3-mediated branches (right).

The dissociation rates of Arp2/3-nucleated filaments exposed to nearly saturating amounts (3 μM) of VCA from different NPFs were measured, as in Fig 2. The histogram represents the average  $k_{off}$  of three independent measurements (black dots) and the error bars represent the standard deviation. The dissociation rate of SPIN90-Arp2/3-nucleated filaments is  $0.037 \pm 0.003$ ,  $0.022 \pm 0.002$ , and  $0.011 \pm 0.001$  s<sup>-1</sup>, for N-WASP, WASH, and WASP, respectively. The dissociation rate of Arp2/3-mediated actin branches is  $0.012 \pm 0.003$ ,  $0.016 \pm 0.005$ , and  $0.007 \pm 0.003$  s<sup>-1</sup>, for N-WASP, WASH, and WASP, respectively. The *P*-values were determined with an unpaired *t*-test.

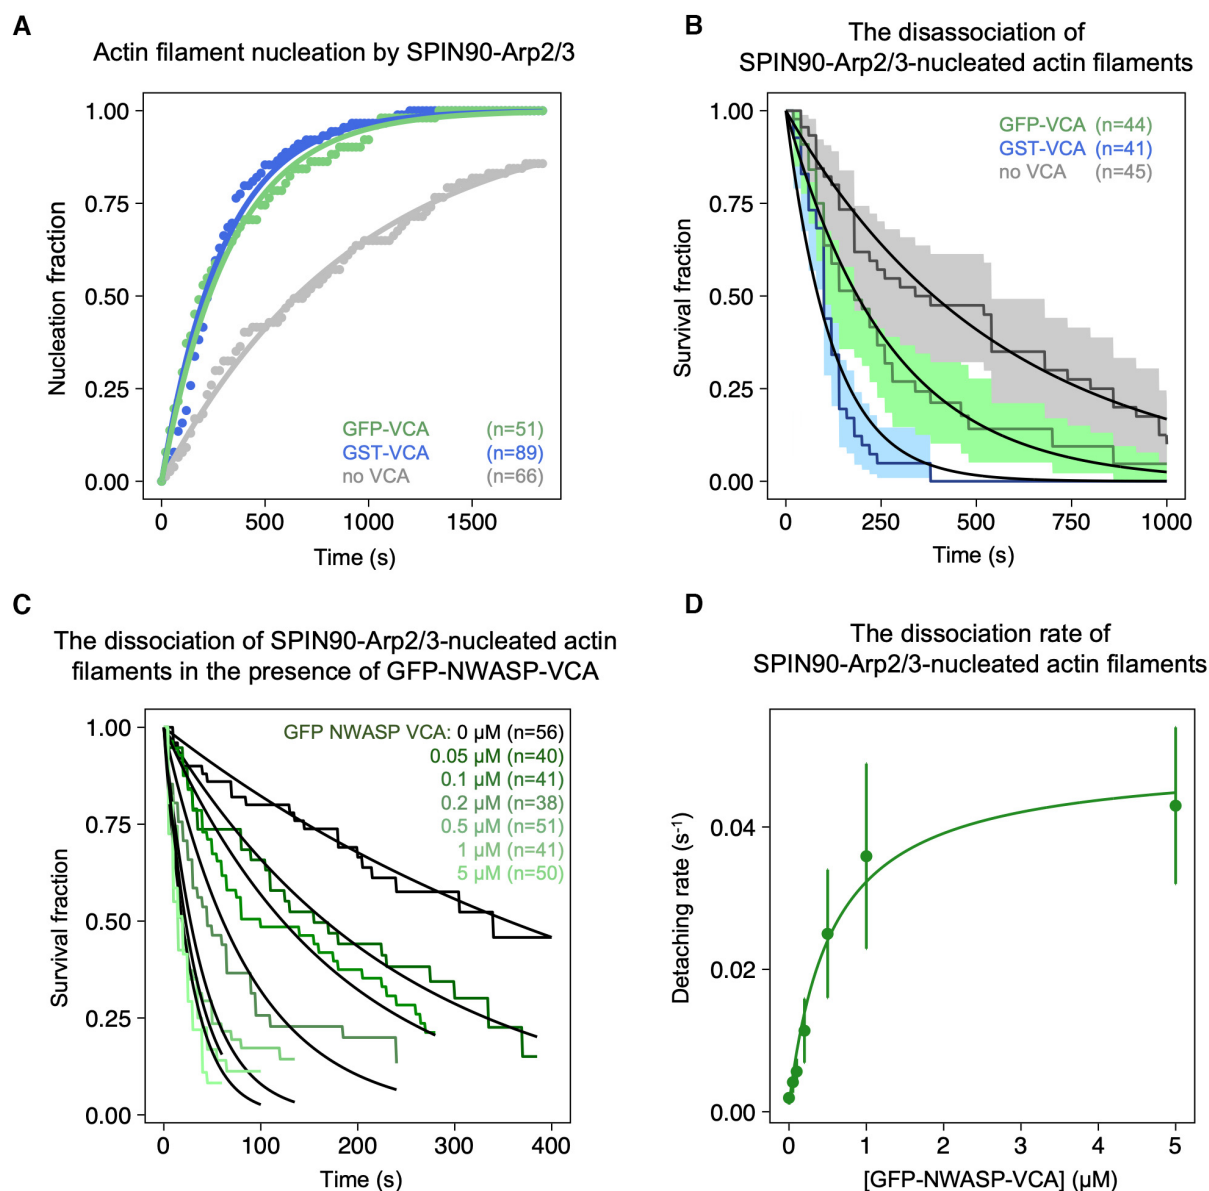

**Figure EV2. Impact of VCA dimerization.**

- A Normalized number of filaments nucleated over time, from SPIN90-Arp2/3 exposed to 2  $\mu\text{M}$  G-actin (15% labeled with Alexa488) and 1  $\mu\text{M}$  profilin, with 0 or 0.5  $\mu\text{M}$  of GST-N-WASP-VCA or GFP-N-WASP-VCA. Solid lines are exponential fits, yielding nucleation rates  $k_{\text{nuc}} = (1.06 \pm 0.03) \times 10^{-3} \text{ s}^{-1}$  without VCA, and  $k_{\text{nuc}} = (3.23 \pm 0.08) \times 10^{-3} \text{ s}^{-1}$  and  $(3.02 \pm 0.04) \times 10^{-3} \text{ s}^{-1}$  with GST-N-WASP-VCA and GFP-N-WASP-VCA, respectively. Indicated values of  $n$  are the number of filaments observed in each experiment. These experiments were repeated three times, with similar results.
- B Detachment of SPIN90-Arp2/3-nucleated filaments during the nucleation experiment shown in panel A. Solid lines are exponential fits, yielding dissociation rates  $k_{\text{off}} = (1.8 \pm 0.6) \times 10^{-3} \text{ s}^{-1}$  without VCA, and  $k_{\text{off}} = (7.9 \pm 1.9) \times 10^{-3} \text{ s}^{-1}$  and  $(3.7 \pm 1.4) \times 10^{-3} \text{ s}^{-1}$  with GST-N-WASP-VCA and with GFP-N-WASP-VCA, respectively. Indicated values of  $N$  are the number of filaments observed in each experiment.
- C The fraction of filaments still attached to the surface, versus time, for different concentrations of GFP-NWASP-VCA. Black lines are exponential fits. Indicated values of  $n$  are the number of filaments observed in each experiment. Each experiment was repeated twice (technical replicates), yielding similar results.
- D Detachment rates determined by exponential fits of survival curves (in C) as a function of the concentration of VCA motifs from different NPFs. The error bars result from fits of the 95% confidence interval in the survival curves. The data are fitted by a Michaelis-Menten equation, resulting in  $K_D = 0.56 \pm 0.11 \mu\text{M}$  and  $V_{\text{max}} = 0.049 \pm 0.0034 \text{ s}^{-1}$ .

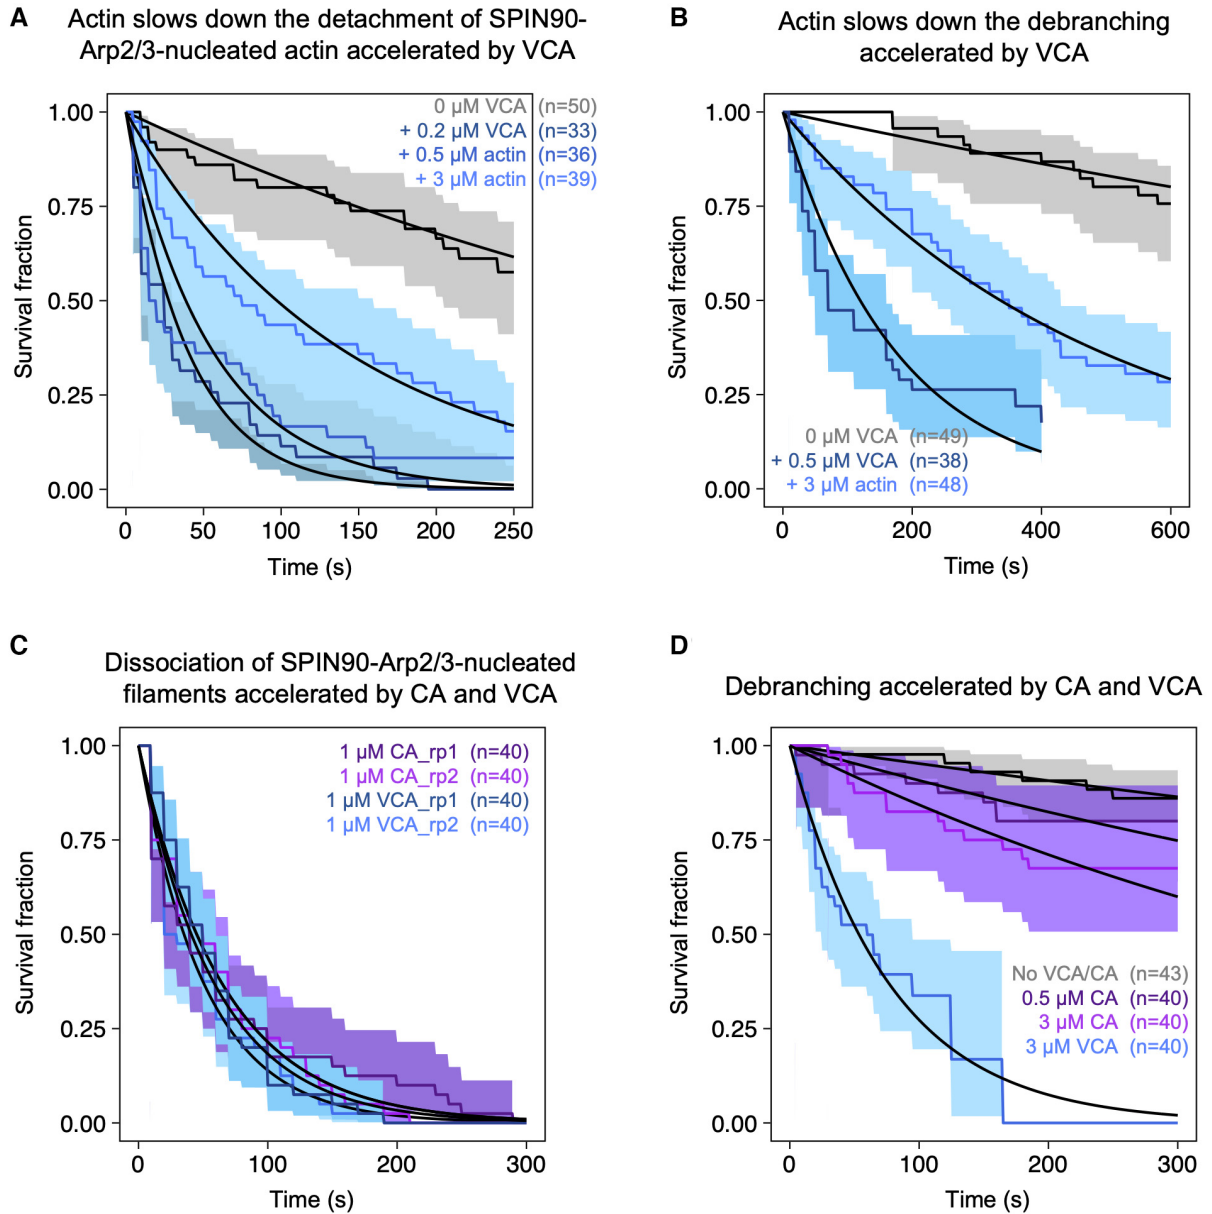

**Figure EV3. The presence of G-actin inhibits the destabilizing action of VCA, but the V domain is not required to enhance the detachment of SPIN90-Arp2/3-nucleated filaments.**

A The fraction of filaments still attached to the surface versus time, exposed to buffer, or to 0.2  $\mu\text{M}$  VCA with different concentrations of G-actin. Black lines are exponential fits, yielding dissociation rates  $k_{\text{off}} = (2.1 \pm 0.8) \times 10^{-3} \text{ s}^{-1}$  without VCA, and  $k_{\text{off}} = (2.6 \pm 0.7) \times 10^{-2} \text{ s}^{-1}$  with 0.2  $\mu\text{M}$  VCA,  $(1.8 \pm 0.8) \times 10^{-2} \text{ s}^{-1}$  with 0.2  $\mu\text{M}$  VCA plus 0.5  $\mu\text{M}$  G-actin, and  $(0.76 \pm 0.28) \times 10^{-2} \text{ s}^{-1}$  with 0.2  $\mu\text{M}$  VCA plus 3  $\mu\text{M}$  G-actin.

B The fraction of actin branches still attached to the mother filaments versus time, exposed to buffer, or to 0.5  $\mu\text{M}$  VCA with 0.15  $\mu\text{M}$  G-actin, or to 0.5  $\mu\text{M}$  VCA with 3  $\mu\text{M}$  G-actin. Black lines are exponential fits, yielding dissociation rates  $k_{\text{off}} = (0.37 \pm 0.7) \times 10^{-3} \text{ s}^{-1}$  without VCA, and  $k_{\text{off}} = (5.8 \pm 2.3) \times 10^{-3} \text{ s}^{-1}$  with 0.5  $\mu\text{M}$  VCA, and  $(2.1 \pm 0.7) \times 10^{-3} \text{ s}^{-1}$  with 0.5  $\mu\text{M}$  VCA plus 3  $\mu\text{M}$  G-actin. The shaded areas represent 95% confidence intervals.

C The fraction of filaments still attached to the surface versus time, exposed to 0.2  $\mu\text{M}$  G-actin supplemented with 1  $\mu\text{M}$  VCA or 1  $\mu\text{M}$  CA. Black lines are exponential fits, yielding dissociation rates  $k_{\text{off}} = (1.7 \pm 0.02) \times 10^{-2} \text{ s}^{-1}$  and  $k_{\text{off}} = (2.0 \pm 0.02) \times 10^{-2} \text{ s}^{-1}$  for the two repeats with VCA;  $k_{\text{off}} = (1.5 \pm 0.02) \times 10^{-2} \text{ s}^{-1}$  and  $k_{\text{off}} = (1.5 \pm 0.02) \times 10^{-2} \text{ s}^{-1}$  for the two repeats with CA.

D The fraction of actin branches still attached to the mother filaments versus time, exposed to buffer, or to 0.15  $\mu\text{M}$  actin supplemented with 0.5  $\mu\text{M}$  CA, 3  $\mu\text{M}$  CA, or 3  $\mu\text{M}$  VCA. Black lines are exponential fits, yielding dissociation rates  $k_{\text{off}} = (5.0 \pm 0.04) \times 10^{-4} \text{ s}^{-1}$  without buffer, and  $k_{\text{off}} = (1.0 \pm 0.01) \times 10^{-3} \text{ s}^{-1}$  with 0.5  $\mu\text{M}$  CA,  $(1.8 \pm 0.01) \times 10^{-3} \text{ s}^{-1}$  with 3  $\mu\text{M}$  CA, and  $(1.3 \pm 0.02) \times 10^{-2} \text{ s}^{-1}$  with 3  $\mu\text{M}$  VCA.

Data information: In the text above, uncertainty intervals correspond to the standard errors. In the figures, the shaded areas represent 95% confidence intervals. Indicated values of n are the number of filaments monitored in each experiment. The flowing solutions applied a weak force to the filaments ( $< 1 \text{ pN}$ ) and to the branches (0.2 pN).

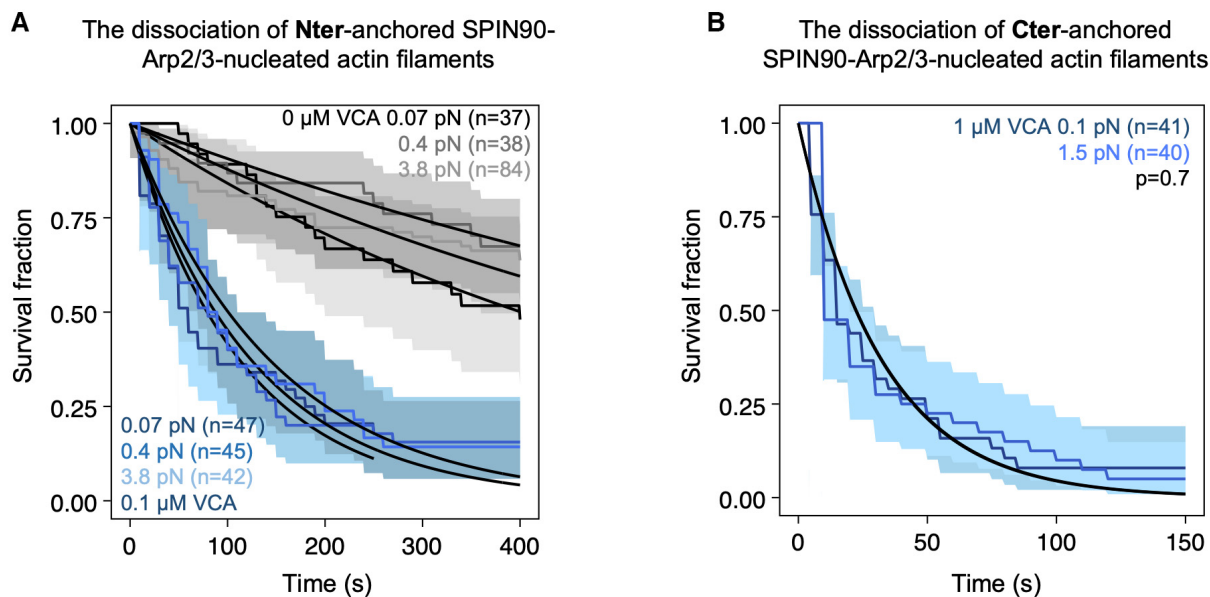

**Figure EV4. Anchoring SPIN90 by its C- or N-terminus has no impact on its behavior.**

**A** Survival fractions for SPIN90-Arp2/3-nucleated filaments exposed to different forces in the microfluidics chamber, while being exposed to 0.15 μM G-actin alone or with 0.1 μM GFP-VCA. In this case, SPIN90 was anchored on the surface through its Nter-GST-tag. Black lines are exponential fits, yielding dissociation rates at 0.07 pN force,  $k_{off} = (1.6 \pm 0.6) \times 10^{-3} \text{ s}^{-1}$  without VCA, and  $k_{off} = (7.5 \pm 3.3) \times 10^{-3} \text{ s}^{-1}$  with 0.1 μM VCA; at 0.4 pN force,  $k_{off} = (1.2 \pm 0.5) \times 10^{-3} \text{ s}^{-1}$  without VCA, and  $k_{off} = (7.4 \pm 3.5) \times 10^{-3} \text{ s}^{-1}$  with 0.1 μM VCA; 3.8 pN,  $k_{off} = (1.3 \pm 0.4) \times 10^{-3} \text{ s}^{-1}$  without VCA, and  $k_{off} = (6.9 \pm 2.4) \times 10^{-3} \text{ s}^{-1}$  with 0.1 μM VCA. The shaded areas represent 95% confidence intervals.

**B** Survival fractions for SPIN90-Arp2/3-nucleated filaments exposed to 1 μM VCA. In this case, SPIN90 was anchored on the surface through its Cter-His-tag. Black lines are exponential fits, yielding dissociation rates  $k_{off} = (3.1 \pm 1.5) \times 10^{-2} \text{ s}^{-1}$  at 0.1 pN force and  $k_{off} = (3.1 \pm 1.3) \times 10^{-2} \text{ s}^{-1}$  at 1.5 pN force. The shaded areas represent 95% confidence intervals.

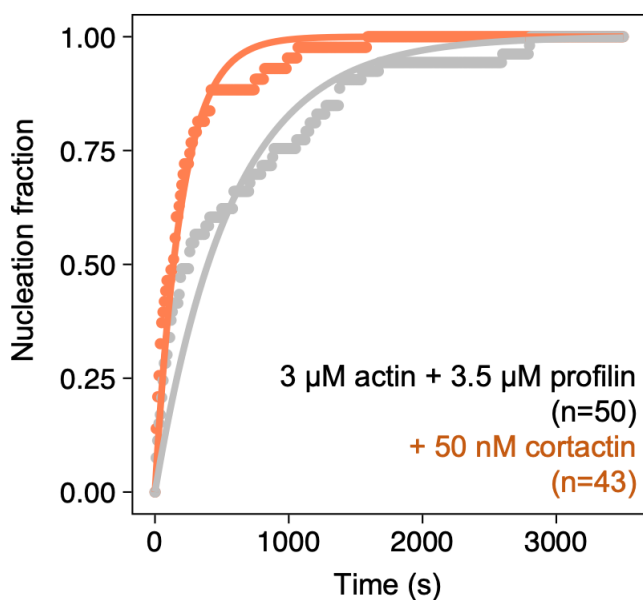

**Figure EV5. SPIN90-Arp2/3 filament nucleation is accelerated by cortactin.**

Normalized number of filaments nucleated over time, from SPIN90-Arp2/3 exposed to 3 μM G-actin (15% labeled with Alexa488) and 3.5 μM profilin, with 0 or 50 nM of cortactin. Solid lines are exponential fits, yielding nucleation rates  $k_{nuc} = (2.0 \pm 0.04) \times 10^{-3} \text{ s}^{-1}$  without cortactin, and  $k_{nuc} = (5.3 \pm 0.08) \times 10^{-3} \text{ s}^{-1}$  with cortactin. Indicated values of n are the number of filaments observed in each experiment.
